# Supplementary material
Source: HighWire-hosted journal article supplement (https://www.ajevonline.org/highwire/filestream/12896/field_highwire_adjunct_files/0/p1_22-038.pdf)
Supplement: p1_22-038.pdf [file p1_22-038.pdf]

**Supplemental Data for:**

Xi X, Zha Q, Yin X and Jiang A. 2023. Changes in sugar, anthocyanin, and ABA accumulation in response to cluster thinning and girdling in Jumeigui grape. *Am J Enol Vitic* 74:6. DOI: 10.5344/ajev.2022.22038

**Supplemental Table 1** Primers used for the quantification of gene expression levels by qRT-PCR.

| Gene name  | Accession number  | Forward (5'→3')        | Reverse (5'→3')          |
|------------|-------------------|------------------------|--------------------------|
| CHS2       | AB066275          | GAAGATGGGAATGGCTGCTG   | AAGGCACAGGGACACAAAAG     |
| CHI1       | X75963            | CAGGCAACTCCATTCTTTTC   | TTCTCTATCACTGCATTCCC     |
| F3H1       | X75965            | CCAATCATAGCAGACTGTCC   | TCAGAGGATACACGGTTGCC     |
| F3H2       | TC45490           | CTGTGGTGAACCTCCGACTGC  | CAAATGTTATGGGCTCCTCC     |
| F3'5'H     | AB213606          | AAACCGCTCAGACCAAAACC   | ACTAAGCCACAGGAAACTAA     |
| DFR        | X75964            | GAAACCTGTAGATGGCAGGA   | GGCCAAATCAAACCTACCAGA    |
| LDOX       | X75966            | AGGGAAGGGAAAACAAGTAG   | ACTCTTTGGGGATTGACTGG     |
| UFGT       | AF000372          | GGGATGGTAATGGCTGTGG    | ACATGGGTGGAGAGTGAGTT     |
| OMT        | FJ460168          | GTTCAACTTCATGAGATGGA   | GGAGAACTACCTCAACTACCA    |
| antho-MATE | FJ264202          | GCAAACAACAGAGAGGATGC   | AGACCTCGACAATGATCTTAC    |
| MYB5a      | AY555190          | GTGCAGCAGCCATCTAATGTG  | GCAGCAGGTTCCCAGACAGT     |
| MYB5b      | AY899404          | GGTGTTCCTTAATTTGGCTTCA | CACAACAACACAACCACATACA   |
| MYBPA1     | AM259485          | CATGCACGTGCTCACCTT     | CCGCACGTATCGCTATTATAAG   |
| VIMYB1-3   | AB427165          | GGCTTCTGGAGAGGTGCTTA   | CTGTGTTGGGAAAATCCCA      |
| MYB4       | EF113078          | ACCGGACGTTACAACCATATC  | TCCGTAACCTGGGTTTTTCTCA   |
| NCED1      | AY337613          | GAGACCCCAACTCTGGCAGG   | AAGGTGCCGTGGAATCCATAG    |
| NCED2      | AY337614          | AGTTCCATACGGGTTTCATGGG | CCATTTTCCAAATCCAGGGTGT   |
| VvAIN      |                   | CCATCTCCATCCCATCGTAACC | GGCTATCCAAGTTTCCAACCAACC |
| NI         | NM_001281047.1    | TTGCAGCTAATGACCCAGGG   | GCAGTCCACAGTCTTCTCCC     |
| SS         | BG273882.1        | CCAGCCAACGTCATTAGCCT   | CCATGACTTGTGGCCTTCCT     |
| VvActin1   | XM_002282480      | CTTGCATCCCTCAGCACCTT   | TCTGTGGACAATGGATGGA      |
| VvGAPDH    | VIT_17s0000g10430 | TTCCGTGTTCTACTGTTG     | CCTCTGACTCCTCCTTGAT      |

**Supplemental Data for:**

Xi X, Zha Q, Yin X and Jiang A. 2023. Changes in sugar, anthocyanin, and ABA accumulation in response to cluster thinning and girdling in Jumeigui grape. *Am J Enol Vitic* 74:6. DOI: 10.5344/ajev.2022.22038

**Supplemental Table 2** Effect of cluster thinning and girdling (separated or combined) on the anthocyanin profiles (expressed as mg/g fresh weight) at harvest in 2016 and 2017.

| Number | Compounds                                                       | RT (min) | Year | CK                  | T1     | T2     | T3     |
|--------|-----------------------------------------------------------------|----------|------|---------------------|--------|--------|--------|
| 1      | Peonidin 3- <i>O</i> -glucoside-5- <i>O</i> -glucoside          | 16.44    | 2016 | 0.01 a <sup>a</sup> | 0.01 a | 0.02 b | 0.03 c |
|        |                                                                 |          | 2017 | 0.02 a              | 0.03 a | 0.04 b | 0.11 c |
| 2      | Cyanidin-3- <i>O</i> -glucoside                                 | 19.16    | 2016 | 0.02 a              | 0.02 a | 0.01 a | 0.02 a |
|        |                                                                 |          | 2017 | 0.03 a              | 0.05 b | 0.07 c | 0.17 d |
| 3      | Peonidin-3- <i>O</i> -glucoside                                 | 21.13    | 2016 | 0.01 a              | 0.01 a | 0.01 b | 0.03 c |
|        |                                                                 |          | 2017 | 0.03 a              | 0.03 a | 0.04 a | 0.11 b |
| 4      | Malvidin-3- <i>O</i> -glucoside                                 | 23.99    | 2016 | 0.12 a              | 0.13 a | 0.17 b | 0.23 c |
|        |                                                                 |          | 2017 | 0.22 a              | 0.32 b | 0.49 c | 0.84 d |
| 5      | Delphinidin-3- <i>O</i> -acetylglucoside                        | 25.34    | 2016 | 0.05 a              | 0.10 b | 0.24 c | 0.42 d |
|        |                                                                 |          | 2017 | 0.28 a              | 0.28 a | 0.36 b | 0.68 c |
| 6      | Cyanidin 3- <i>O</i> -glucoside-5-glucoside-p-coumarate         | 35.98    | 2016 | 0.02 a              | 0.02 a | 0.01 a | 0.02 a |
|        |                                                                 |          | 2017 | 0.02 a              | 0.02 a | 0.03 b | 0.05 c |
| 7      | Peonidin 3- <i>O</i> -glucoside-5- <i>O</i> -glucoside-caffeate | 36.67    | 2016 | 0.01 a              | 0.01 a | 0.01 a | 0.04 b |
|        |                                                                 |          | 2017 | 0.02 a              | 0.02 a | 0.02 a | 0.04 b |
| 8      | Delphinidin-3- <i>O</i> -coumarylglucoside                      | 38.31    | 2016 | 0.01 a              | 0.01 a | 0.01 b | 0.02 c |
|        |                                                                 |          | 2017 | 0.01 a              | 0.02 a | 0.02 a | 0.04 b |
| 9      | Malvidin-3- <i>O</i> -acetylglucoside                           | 38.70    | 2016 | 0.01 b              | 0.01 a | 0.01 b | 0.02 c |
|        |                                                                 |          | 2017 | 0.02 b              | 0.01 a | 0.02 b | 0.03 c |
| 10     | Peonidin-3- <i>O</i> -coumarylglucoside-5- <i>O</i> -glucoside  | 41.19    | 2016 | 0.02 c              | 0.01 a | 0.01 a | 0.01 b |
|        |                                                                 |          | 2017 | 0.01 a              | 0.01 a | 0.02 b | 0.04 c |
| 11     | Malvidin-3- <i>O</i> -coumarylglucoside-5- <i>O</i> -glucoside  | 41.92    | 2016 | 0.01 a              | 0.01 a | 0.02 b | 0.03 c |
|        |                                                                 |          | 2017 | 0.02 a              | 0.02 a | 0.02 a | 0.04 b |
| 12     | Cyanidin-3- <i>O</i> -coumarylglucoside                         | 42.18    | 2016 | 0.01 a              | 0.01 a | 0.02 b | 0.04 c |
|        |                                                                 |          | 2017 | 0.03 b              | 0.02 a | 0.02 a | 0.05 c |
| 13     | Petunidin-3- <i>O</i> -coumarylglucoside                        | 45.21    | 2016 | 0.03 a              | 0.03 a | 0.08 b | 0.14 c |
|        |                                                                 |          | 2017 | 0.08 a              | 0.09 a | 0.13 b | 0.24 c |
| 14     | Malvidin-3- <i>O</i> -caffeoylglucoside                         | 45.63    | 2016 | 0.06 a              | 0.05 a | 0.09 b | 0.17 c |
|        |                                                                 |          | 2017 | 0.13 a              | 0.11 a | 0.13 a | 0.23 b |

<sup>a</sup>Different letters within a row indicate statistically different values ( $p < 0.05$ ) according to Duncan's multiple range test.

**Supplemental Data for:**

Xi X, Zha Q, Yin X and Jiang A. 2023. Changes in sugar, anthocyanin, and ABA accumulation in response to cluster thinning and girdling in Jumeigui grape. *Am J Enol Vitic* 74:6. DOI: 10.5344/ajev.2022.22038

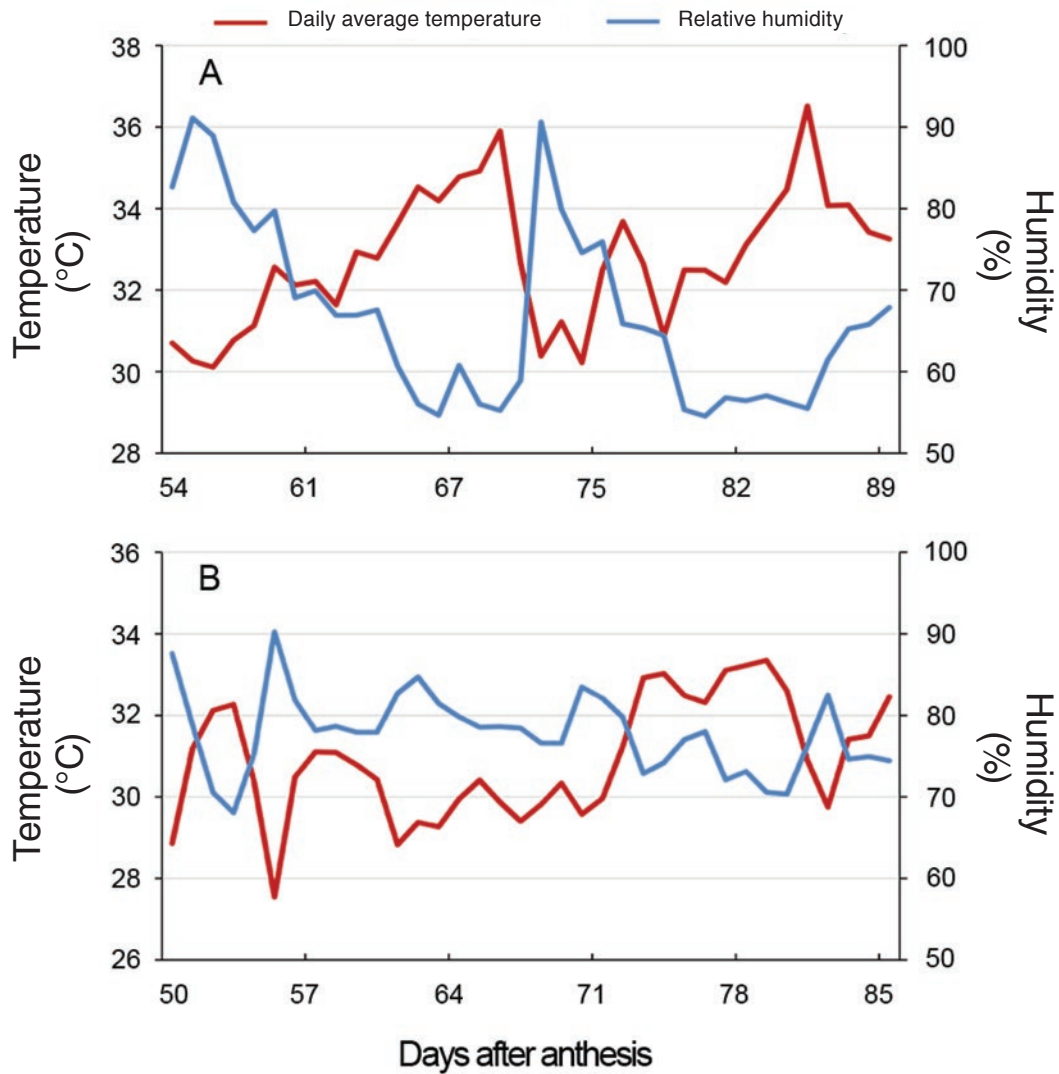

**Supplemental Figure 1** Daily average temperature (°C) and relative humidity (%) within the greenhouse of experimental vineyard at Shanghai Academy of Agricultural Sciences (Shanghai, China) throughout the ripening periods in 2016 (A) and 2017 (B).

**Supplemental Data for:**

Xi X, Zha Q, Yin X and Jiang A. 2023. Changes in sugar, anthocyanin, and ABA accumulation in response to cluster thinning and girdling in Jumeigui grape. *Am J Enol Vitic* 74:6. DOI: 10.5344/ajev.2022.22038

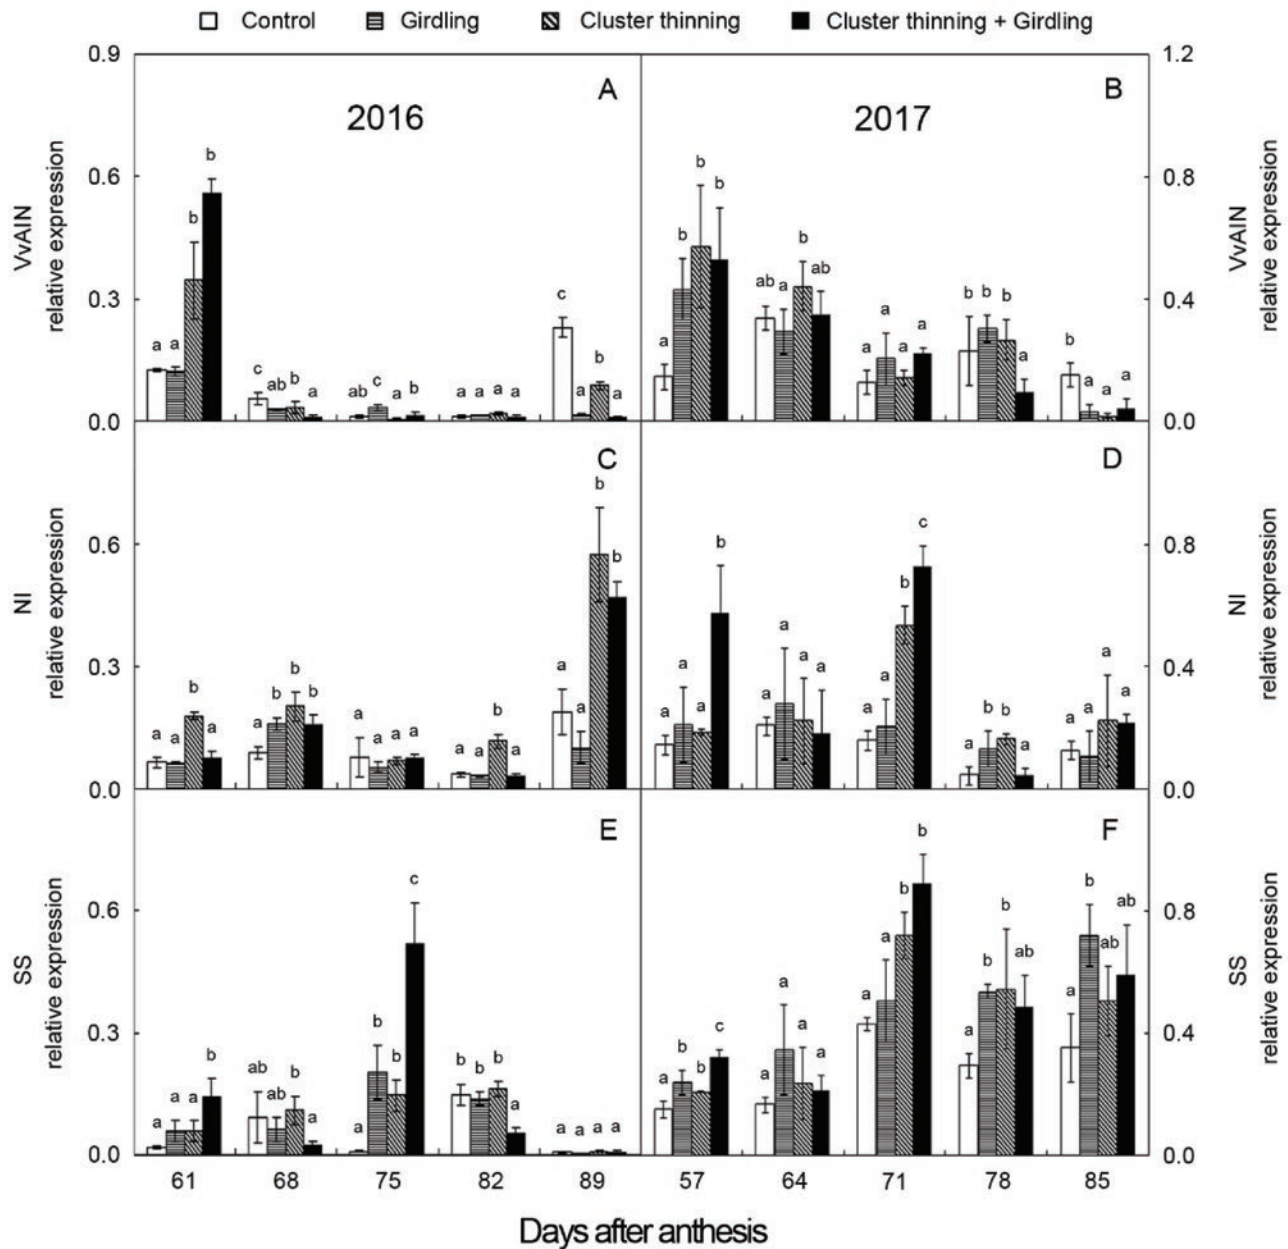

**Supplemental Figure 2** Expression levels of genes involved in sugar accumulation under cluster thinning and girdling (separated or combined) in two consecutive seasons. (A, B) VvAIN; (C, D) NI; (E, F) SS. Data presented are means  $\pm$  SE (n = 3). Different letters indicate significant differences among treatments at the same date using Duncan's multiple range test ( $p < 0.05$ ).

**Supplemental Data for:**

Xi X, Zha Q, Yin X and Jiang A. 2023. Changes in sugar, anthocyanin, and ABA accumulation in response to cluster thinning and girdling in Jumeigui grape. *Am J Enol Vitic* 74:6. DOI: 10.5344/ajev.2022.22038

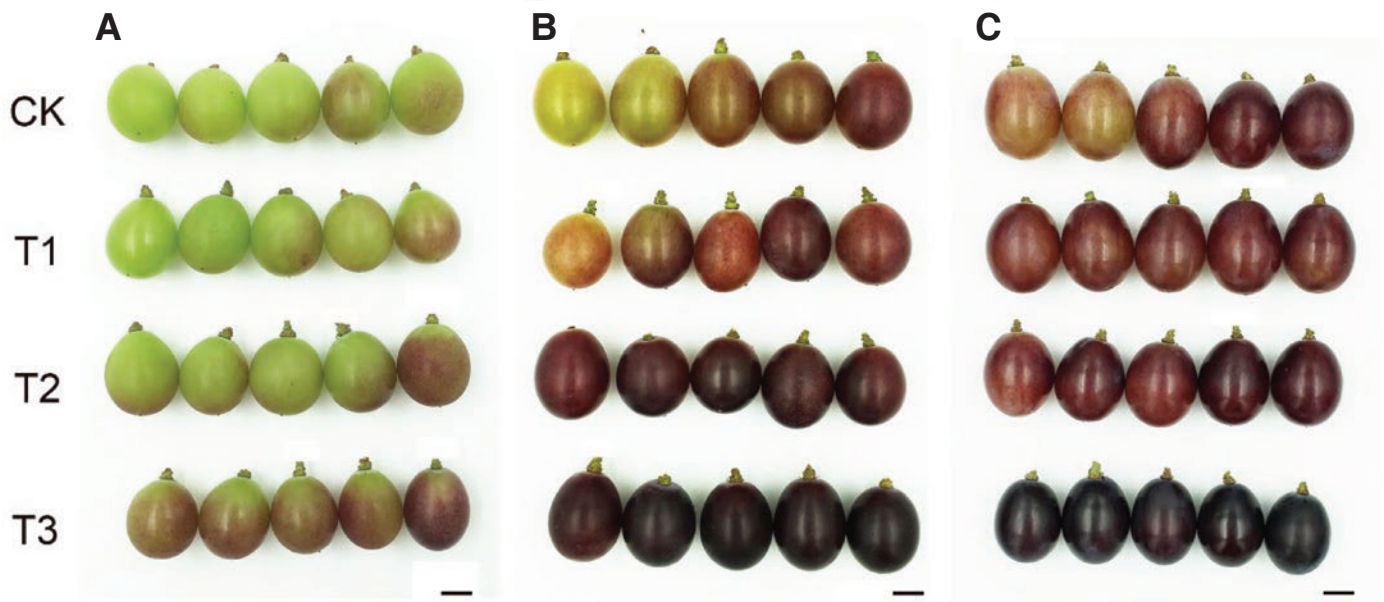

**Supplemental Figure 3** Comparison of skin coloration under cluster thinning and girdling (separated or combined) in 2017. (A) 57 DAA; (B) 71 DAA; (C) 85 DAA. CK, control; T1, girdling; T2, cluster thinning; T3, cluster thinning + girdling. The bar represents 1 cm.

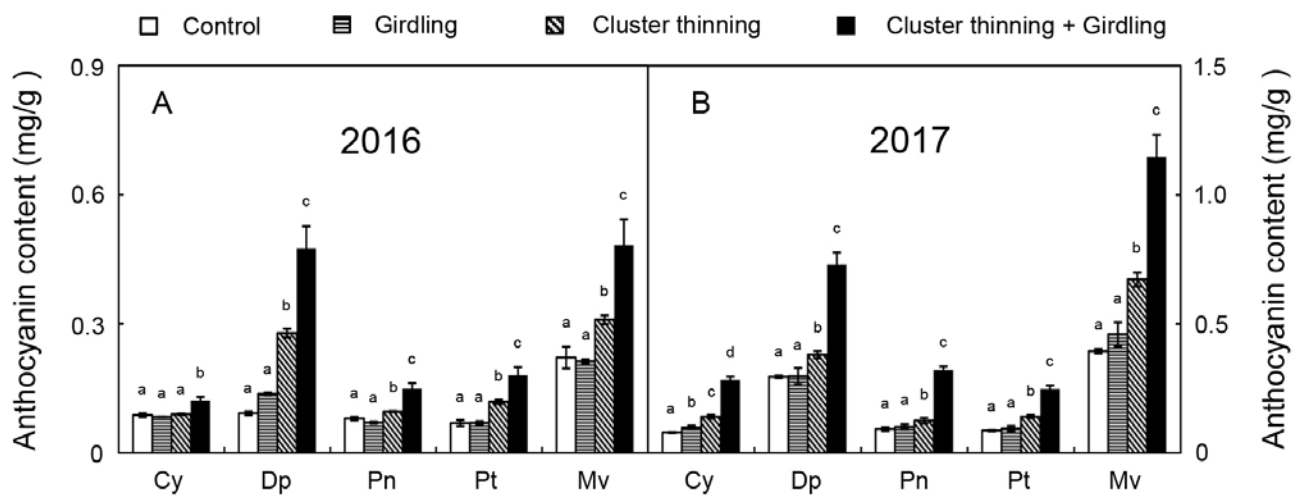

**Supplemental Figure 4** Effect of cluster thinning and girdling (separated or combined) on the concentration of five anthocyanin groups at harvest across two consecutive seasons. (A) 2016; (B) 2017. Cy, cyanidin derivatives; Dp, delphinidin derivatives; Mv, malvidin derivatives; Pn, peonidin derivatives; Pt, petunidin derivatives. Data presented are means  $\pm$  SE ( $n = 3$ ). Different letters indicate significant differences among treatments at the same date using Duncan's multiple range test ( $p < 0.05$ ).
